# Supplementary material for: Extremely rare variants reveal patterns of germline mutation rate heterogeneity in humans
Source: PubMed Central journal article supplement (PMC6138700; doi:10.1038/s41467-018-05936-5), 2018-09-14
Supplement: 41467_2018_5936_MOESM2_ESM.pdf [file 41467_2018_5936_MOESM2_ESM.pdf]

- 1 **Supplementary information for “Extremely rare variants reveal patterns of**
- 2 **germline mutation rate heterogeneity in humans” by Carlson et al.**

## Table of Contents

|    |                                                                                    |    |
|----|------------------------------------------------------------------------------------|----|
| 3  | Supplementary Note .....                                                           | 3  |
| 4  | Supplementary Note 1. Identification of outlier samples .....                      | 3  |
| 5  | Supplementary Note 2. Estimation of false discovery rate by Ts/Tv statistics ..... | 4  |
| 6  | Supplementary Note 3. Potential sources of bias among ERVs .....                   | 4  |
| 7  | 3.1. Motif-specific error rates.....                                               | 4  |
| 8  | 3.2. Mapping error .....                                                           | 5  |
| 9  | 3.3. Mispolarization of ERVs .....                                                 | 6  |
| 10 | Supplementary Note 4. Curation of MAC10+-derived mutation rate estimates .....     | 7  |
| 11 | Acknowledgements .....                                                             | 9  |
| 12 | Supplementary References .....                                                     | 10 |
| 13 | Supplementary Figures.....                                                         | 11 |
| 14 | Supplementary Figure 1 .....                                                       | 12 |
| 15 | Supplementary Figure 2 .....                                                       | 13 |
| 16 | Supplementary Figure 3 .....                                                       | 14 |
| 17 | Supplementary Figure 4 .....                                                       | 15 |
| 18 | Supplementary Figure 5 .....                                                       | 16 |
| 19 | Supplementary Figure 6 .....                                                       | 17 |
| 20 | Supplementary Figure 7 .....                                                       | 18 |
| 21 | Supplementary Figure 8 .....                                                       | 19 |
| 22 | Supplementary Tables .....                                                         | 20 |
| 23 | Supplementary Table 1 .....                                                        | 20 |
| 24 | Supplementary Table 2 .....                                                        | 20 |
| 25 | Supplementary Table 3 .....                                                        | 21 |
| 26 | Supplementary Table 4 .....                                                        | 21 |
| 27 | Supplementary Table 5 .....                                                        | 22 |
| 28 | Supplementary Table 6 .....                                                        | 24 |
| 29 | Supplementary Table 7 .....                                                        | 25 |

## 30 Supplementary Note

### 31 **Supplementary Note 1. Identification of outlier samples**

32 For the 3,716 individuals that passed our initial sample-level filters, we summarized the per-sample  
33 distribution of extremely rare variants (ERVs) across 3-mer subtypes and used this information to flag  
34 individuals that showed abnormal patterns of variation indicative of systematic sequencing errors or  
35 batch effects. In brief, we adapted the non-negative matrix factorization (NMF) technique described by  
36 Lawrence et al.<sup>1</sup> to deconvolute the 3-mer mutation spectra as a composite of 3 distinct “signatures.”  
37 Assuming the population has been susceptible to the same mutation processes over the timespan in  
38 which ERVs have accumulated, we expect that the relative contribution of the 3 NMF signatures is  
39 stable across individuals. Applying this strategy, we identified 156 individuals where one or more  
40 signatures had a contribution >2 standard deviations away from the mean contribution of that signature  
41 (calculated across all individuals).

42 These outliers exhibited one of two distinct signatures indicative of error biases. The first signature,  
43 characterized by an unusually high proportion of C>A and G>T singletons, was overrepresented in 112  
44 of these samples, consistent with patterns of oxidative damage that are known to occur during DNA  
45 shearing, likely due to the presence of reactive contaminants<sup>2</sup>. The second signature, characterized by  
46 depleted rates of C>N and G>N ERVs, was overrepresented in the remaining 44 samples. Further  
47 investigation of the samples carrying this signature showed many had higher GC bias scores (i.e.,  
48 systematically lower depth of coverage in GC-rich regions), likely resulting in lower calling rates for C>N  
49 and G>N types. Moreover, 24 of the 44 samples were sequenced in the same batch, and the remaining  
50 20 samples were distributed across only 8 of the 48 other batches, indicating that these coverage  
51 biases and resulting error signatures clustered by batch. To limit the confounding effects of  
52 nonbiological variation present in the data, we excluded the 156 samples displaying either of these  
53 error signatures. Note that doubletons in the pre-filtered sample that would have become singletons in  
54 the post-filtered sample were not included in our analysis. Many of these variants are likely true  
55 doubletons in the BRIDGES sample and hence present in the population at a higher frequency (i.e.,

56 having arose further in the past) than the average singleton, so retaining these ambiguous variants  
57 might inadvertently affect the distribution of variants.

## 58 **Supplementary Note 2. Estimation of false discovery rate by Ts/Tv statistics**

59 We estimate the false discovery rate among BRIDGES ERVs using the following method.

60 (1) Let  $TS_o = TS_t + TS_f$  be the number of observed transitions (23,733,766), consisting of both true  
61 positives ( $TS_t$ ), and false positives ( $TS_f$ )

62 (2) Let  $TV_o = TV_t + TV_f$  be the number of observed transversions (11,840,651).

63 (3) Based on findings from other large-scale sequencing studies, the true positive Ts/Tv ratio,

64  $TSTV_T = \frac{TS_t}{TV_t}$  is expected to be between 2.0 and 2.1<sup>3</sup>.

65 (4) Because there are 8 possible transversions and 4 possible transitions, if errors have occurred at  
66 random, the Ts/Tv ratio for random false positive errors ( $TSTV_\epsilon$ ) should be 0.5, that is,  $\frac{TS_f}{TV_f} = 0.5$ ,  
67 assuming no systematic sequencing error biases.

68 Solving this system of four equations, it follows that  $TV_f = \frac{TSTV_T \times TV_o - TS_o}{TSTV_T - 0.5}$  and  $TS_f = 0.5 \times TV_f$ , so the

69 false discovery rate,  $\frac{TS_f + TV_f}{TS_o + TV_o}$ , can be estimated as:

$$70 \quad \frac{TS_f + TV_f}{TS_o + TV_o} = \frac{0.5 \left( \frac{TSTV_T \times TV_o - TS_o}{TSTV_T - 0.5} \right) + \frac{TSTV_T \times TV_o - TS_o}{TSTV_T - 0.5}}{TS_o + TV_o}$$

71 Assuming the true Ts/Tv ratio ( $TSTV_T$ ) is between 2.0 and 2.1, by this calculation we estimate a false  
72 discovery rate of 0.1-2.9% among the BRIDGES ERVs.

## 73 **Supplementary Note 3. Potential sources of bias among ERVs**

### 74 **3.1. Motif-specific error rates**

75 Certain sequence motifs may be more susceptible to sequencing error, which could lead to a non-

76 random distribution of false positive singleton calls and subsequently bias our analyses<sup>4,5</sup>. Allhoff et al.

77 (2013)<sup>5</sup> reported context-specific errors for the Illumina HiSeq platform, noting that the most common of

78 these are strand-specific T>N errors at 5'-GGGT-3' motifs (i.e., there is no evidence of an excess of

79 A>N errors at the reverse complement 5'-ACCC-3' motifs). We reason that if the BRIDGES ERVs are  
80 enriched for such context-specific errors, we should see significantly more T>N ERVs at the 5'-GGGT-  
81 3' motif than A>N ERVs at the 5'-ACCC-3' and motif. Of the 127,831 ERVs that occur at this motif,  
82 63,861 were 5'-[A>N]CCC-3' variants, and 63,970 were 5'-GGG[T>N]-3' variants; this difference was  
83 not significant, indicating there is no evidence for an enrichment of T>N ERVs at this error-prone motif  
84 (exact binomial test; P=0.67). Allhoff et al. remark that the variants called at error-prone positions  
85 tended to have low base quality scores as well as significant strand bias, both of which are detectable  
86 with standard filtering protocols<sup>5</sup>. We therefore assume that most motif-specific errors are filtered by the  
87 default strand-bias and quality filters used in our variant calling pipeline, and any undetected errors  
88 have a negligible impact on our calculation of relative mutation rates and downstream analyses.

### 89 3.2. Mapping error

90 We expect the majority of ERVs in our data are mapped with high confidence, as the pre-filtering steps  
91 in our variant calling pipeline remove sites occurring on reads with average phred-scaled mapping  
92 quality score (MQ) <20 and/or where more than 10% of reads were ambiguously mapped (MQ0>10).  
93 This filtering strategy is similar to the filters employed by other large-scale sequencing projects that  
94 have demonstrated well-controlled error rates among singleton calls<sup>6,7</sup>. Because mapping errors are  
95 more likely to occur in highly-repetitive regions, such as centromeric and pericentromeric loci<sup>8</sup>, including  
96 these regions in our analyses might bias our estimates of motif-specific mutation rates and/or the  
97 impact of genomic features. However, excluding these regions entirely might have detrimental side  
98 effects: dropping ERVs in these regions will reduce the precision of our estimates, and removing hard-  
99 to-map regions might preclude our ability to assess mutation patterns unique to these regions, as they  
100 may have many levels of heterogeneous overlap with genomic features.

101 To determine if excluding repeat-rich regions systematically influenced our inferred rates, we compared  
102 the 7-mer relative mutation rates estimated from the full, unfiltered set of ERVs with 7-mer rates  
103 estimated if we only count ERVs and reference motifs within the 1000 Genomes strict accessibility  
104 mask, which delineates the most uniquely mappable regions of the genome (covering ~72% of non-N

105 bases). These two sets of estimates were very well-correlated: within-type correlations were  $>0.96$ ,  
106 indicating the estimated rates were highly consistent regardless of whether hard-to-map regions were  
107 removed (**Supplementary Fig. 6a**). Moreover, subtypes with larger differences between the two  
108 estimates tended to have fewer ERVs (**Supplementary Fig. 6b**), suggesting that most observed  
109 discrepancies might simply be an artifact of reduced precision among rare mutation classes.

110 When we applied the masked rates to predict the set of *de novo* mutations, we found these estimates  
111 had worse predictive performance than the unmasked estimates (**Table 1**). This result leads us to  
112 conclude that aggressively filtering for the highest-confidence call set comes at a cost of substantially  
113 reducing the precision of the relative mutation rate estimates, and potentially causing greater bias by  
114 ignoring the information captured by ERVs in the masked regions. Although we cannot entirely exclude  
115 the possibility of mapping error biases among the unmasked estimates, the benefits of having more  
116 numerous singletons across more contiguous genomic regions in the unmasked data outweigh the  
117 concerns about errors caused by poor mapping quality.

### 118 3.3. Mispolarization of ERVs

119 While most singletons in the BRIDGES sample are the true derived allele, population genetic theory  
120 suggests that  $<1/N=0.014\%$  of singletons in a sample are the ancestral allele, and hence subject to the  
121 same evolutionary biases we wish to avoid. These mispolarized singletons may be hard to detect, as  
122 we expect  $\sim 0.25\%$  of all singletons to carry the same allele in human and chimpanzee due to parallel  
123 mutations that have occurred since splitting from a common ancestor. Intuitively, these parallel  
124 mutations are especially likely to occur in hypermutable loci, so removing the  $0.25\%$  “ancestral” alleles  
125 created by parallel mutation may create a bigger bias than including the  $0.015\%$  truly ancestral alleles.

126 To understand the impact of removing all putatively ancestral alleles, we used an ancestral genome  
127 inferred by 6-way primate alignment<sup>9</sup> to annotate each allele with the putative ancestral state. We  
128 identified 363,705 singletons ( $\sim 1\%$  of all singletons) where the alternative allele was the same as the  
129 ancestral allele, and recalculated 7-mer relative mutation rates after removing these putatively  
130 mispolarized singletons. We found that this polarization filter did not strongly affect estimated rates:

131 across all types combined as well as within each type, the rates before and after removal of these sites  
132 were nearly perfectly correlated (Spearman's  $r > 0.999$ ). Further, we found that only 9 of the 24,576 7-  
133 mer rates differed significantly after applying this filter, and the re-estimated rates for these 9 subtypes  
134 differed from the original rates by no more than 10%. More importantly, 8 of these 9 subtypes were  
135 hypermutable CpG>TpG subtypes, consistent with our intuition that many putatively mispolarized sites  
136 are in fact parallel mutations in the human and chimpanzee lineages.

137 As a final analysis of the potential effects of mispolarization on our estimates, we applied these filtered  
138 rates to predict the GoNL/ITMI *de novo* mutations in the same logistic regression framework used to  
139 compare other estimation strategies. Goodness-of-fit statistics indicated that the filtered rates predicted  
140 *de novo* mutations better than 7-mer rates estimated without the polarization filter ( $\Delta AIC = 298$ ).  
141 However, when comparing goodness-of-fit between type-specific models, these differences largely  
142 disappeared, with seven types showing negligible differences in AIC ( $\Delta AIC < 7$ ), and the unfiltered  
143 rates had lower AIC for three of these (non-CpG C>T, CpG>GpG, and CpG>ApG). Only two types had  
144 differences in AIC greater than 10: A>T types were predicted slightly better by the filtered rates  
145 ( $\Delta AIC = 16$ ), but CpG>TpG types were predicted better by the unfiltered rates ( $\Delta AIC = 22$ ), suggesting the  
146 accuracy of the filtered rates is particularly affected by parallel mutations at hypermutable CpG sites.  
147 Given this lack of consistent type-specific improvement when applying the polarization filter, we  
148 performed all subsequent analyses using the full set of 35.6 million ERVs.

#### 149 **Supplementary Note 4. Curation of MAC10+-derived mutation rate estimates**

150 A potential concern with comparisons between our ERV-derived mutation rate estimates and  
151 Aggarwala and Voight's 1000G-based estimates<sup>10</sup> is that discrepancies might be partially attributable to  
152 technical differences between the two samples, not necessarily because the 1000G estimates are  
153 based on ancestrally older SNVs. For a more direct comparison, we curated a set of higher-frequency  
154 SNVs found in the BRIDGES data, removing the possibility that the dissimilar estimates are a result of  
155 differences in sequencing platform, variant calling, QC methods, and sampled individuals.

156 Aggarwala and Voight's mutation rate estimates are based on 7,051,667 intergenic variants observed  
157 in N=379 Europeans from the 1000 Genomes Phase I study<sup>10</sup>. Aggarwala and Voight do not state the  
158 exact site frequency spectrum for the European intergenic variants, but claim 26% of intergenic variants  
159 in the 1000G Phase I African sample are singletons or doubletons<sup>10</sup>. Thus, it is reasonable to assume  
160 that >80% of European intergenic SNVs in the 1000G data occur at a frequency greater than  
161  $1/(379*2)=0.0013$  (i.e., the sample MAF of a singleton in the 1000G sample). To obtain SNVs in the  
162 BRIDGES sample in a frequency range comparable to this, we selected all SNVs with a minor allele  
163 count  $\geq 10$  (MAF $\geq 0.0014$ ). We identified 12,088,037 MAC10+ variants in our data, from which we  
164 estimated 7-mer relative mutation rates. We compared these estimates to 1) a set of ERV-derived 7-  
165 mer estimates calculated after randomly downsampling to an equivalent number (12,088,037 ERVs),  
166 and 2) the 1000G estimates. These comparisons show that the MAC10+ estimates are more closely  
167 correlated with the 1000G estimates (**Supplementary Fig. 3**) than with the downsampled ERV-derived  
168 estimates (**Supplementary Fig. 4**). We also used the MAC10+ estimates to predict the GoNL/ITMI *de*  
169 *novo* mutations, and found that this model tended to perform comparably to the 1000G model  
170 (**Supplementary Table 5**).



171 **Acknowledgements**

172 The BRIDGES study was supported by R01 MH094145 to Michael Boehnke and Richard M. Myers and  
173 U01 MH105653 to Michael Boehnke. The collection and storage of cases and controls from the Centre  
174 for Addiction and Mental Health (CAMH) in Toronto and from the Institute of Psychiatry, Psychology  
175 and Neuroscience (IoPPN), King's College London in London, U.K. was supported by funding from  
176 GlaxoSmithKline, from the Canadian Institutes of Health Research to John B. Vincent, MOP-172013  
177 (CAMH), and funding from the National Institute for Health Research (NIHR) Biomedical Research  
178 Centre at South London and Maudsley NHS Foundation Trust and King's College London (IoPPN). The  
179 views expressed are those of the author(s) and not necessarily those of the UK NHS, the NIHR or the  
180 UK Department of Health. Case and control collection was supported by Heinz C. Prechter Bipolar  
181 Research Fund at the University of Michigan Depression Center to Melvin G. McClinnis (Prechter). Data  
182 and biomaterials were collected for the Systematic Treatment Enhancement Program for Bipolar  
183 Disorder (STEP-BD), a multi-center, longitudinal project selected from responses to RFP #NIMH-98-  
184 DS-0001, "Treatment for Bipolar Disorder" which was led by Gary Sachs and coordinated by  
185 Massachusetts General Hospital in Boston, MA with support from 2N01 MH080001-001. The Genomic  
186 Psychiatric Cohort wishes to acknowledge all the research participants in this cohort; the study was  
187 supported by U01 MH105641, R01 MH085548, R01MH104964. The MCTFR study was supported  
188 through grants from the National Institutes of Health DA037904, DA024417, DA036216, DA05147,  
189 AA09367, DA024417, HG007022, and HL117626.

## Supplementary References

1. Lawrence, M. S. *et al.* Mutational heterogeneity in cancer and the search for new cancer-associated genes. *Nature* **499**, 214–8 (2013).
2. Costello, M. *et al.* Discovery and characterization of artifactual mutations in deep coverage targeted capture sequencing data due to oxidative DNA damage during sample preparation. *Nucleic Acids Res.* **41**, 1–12 (2013).
3. DePristo, M. A. *et al.* A framework for variation discovery and genotyping using next-generation DNA sequencing data. *Nat. Genet.* **43**, 491–498 (2011).
4. Minoche, A., Dohm, J. & Himmelbauer, H. Evaluation of genomic high-throughput sequencing data generated on Illumina HiSeq and Genome Analyzer systems. *Genome Biol.* **12**, R112 (2011).
5. Allhoff, M. *et al.* Discovering motifs that induce sequencing errors. *BMC Bioinformatics* **14 Suppl 5**, S1 (2013).
6. Lek, M. *et al.* Analysis of protein-coding genetic variation in 60,706 humans. *Nature* **536**, 285–291 (2016).
7. Walter, K. *et al.* The UK10K project identifies rare variants in health and disease. *Nature* **526**, 82–90 (2015).
8. Horvath, J. E. *et al.* Molecular structure and evolution of an alpha satellite/non-alpha satellite junction at 16p11. *Hum. Mol. Genet.* **9**, 113–23 (2000).
9. McVean, G. A. *et al.* An integrated map of genetic variation from 1,092 human genomes. *Nature* **491**, 56–65 (2012).
10. Aggarwala, V. & Voight, B. F. An expanded sequence context model broadly explains variability in polymorphism levels across the human genome. *Nat. Genet.* **48**, 349–355 (2016).
11. Kundaje, A. *et al.* Integrative analysis of 111 reference human epigenomes. *Nature* **518**, 317–330 (2015).
12. Koren, A. *et al.* Differential relationship of DNA replication timing to different forms of human mutation and variation. *Am. J. Hum. Genet.* **91**, 1033–1040 (2012).
13. Kong, A. *et al.* Fine-scale recombination rate differences between sexes, populations and individuals. *Nature* **467**, 1099–1103 (2010).
14. Guelen, L. *et al.* Domain organization of human chromosomes revealed by mapping of nuclear lamina interactions. *Nature* **453**, 948–51 (2008).
15. Wu, H., Caffo, B., Jaffee, H. A., Irizarry, R. A. & Feinberg, A. P. Redefining CpG islands using hidden Markov models. *Biostatistics* **11**, 499–514 (2010).

# Supplementary Figures

a.

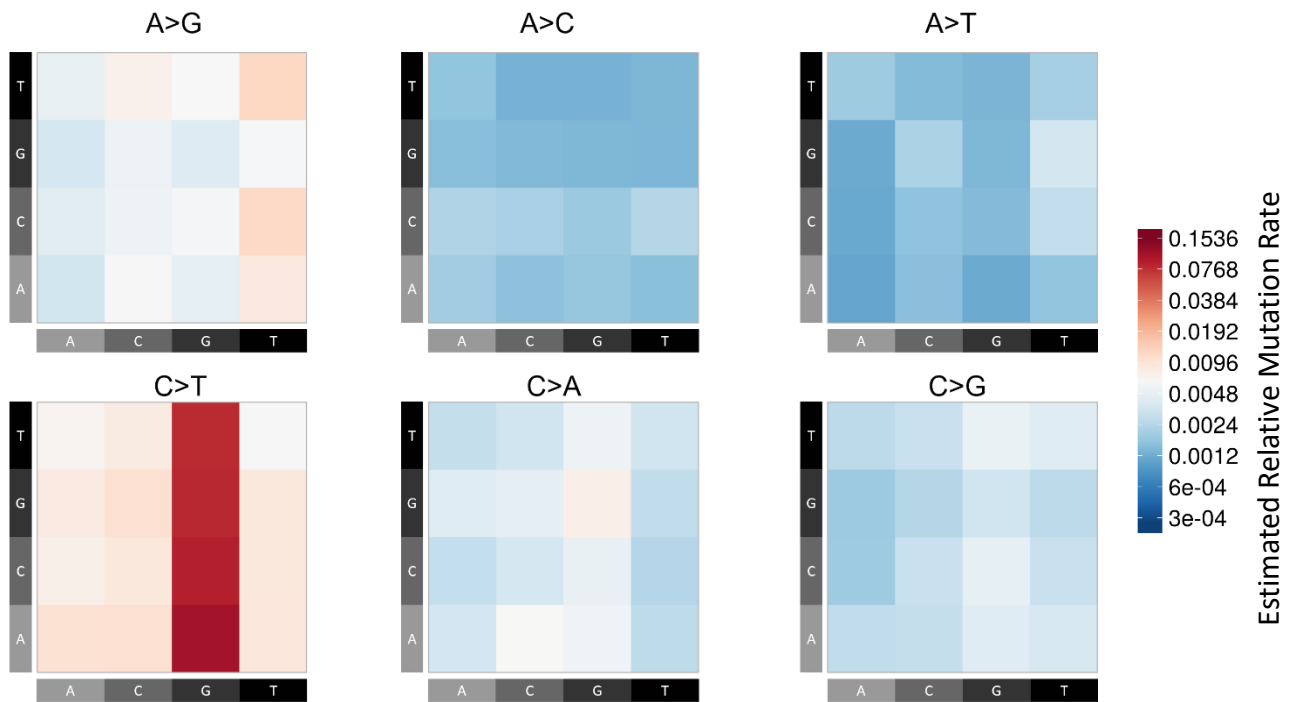

b.

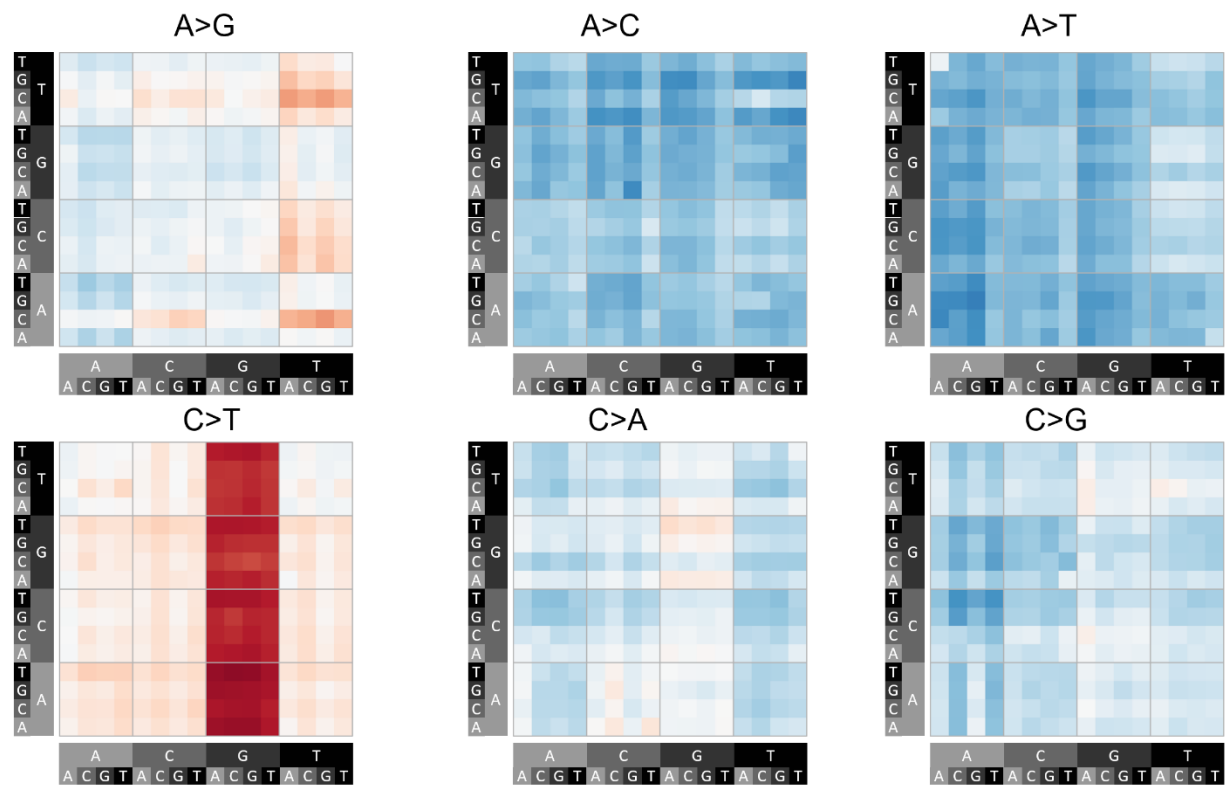



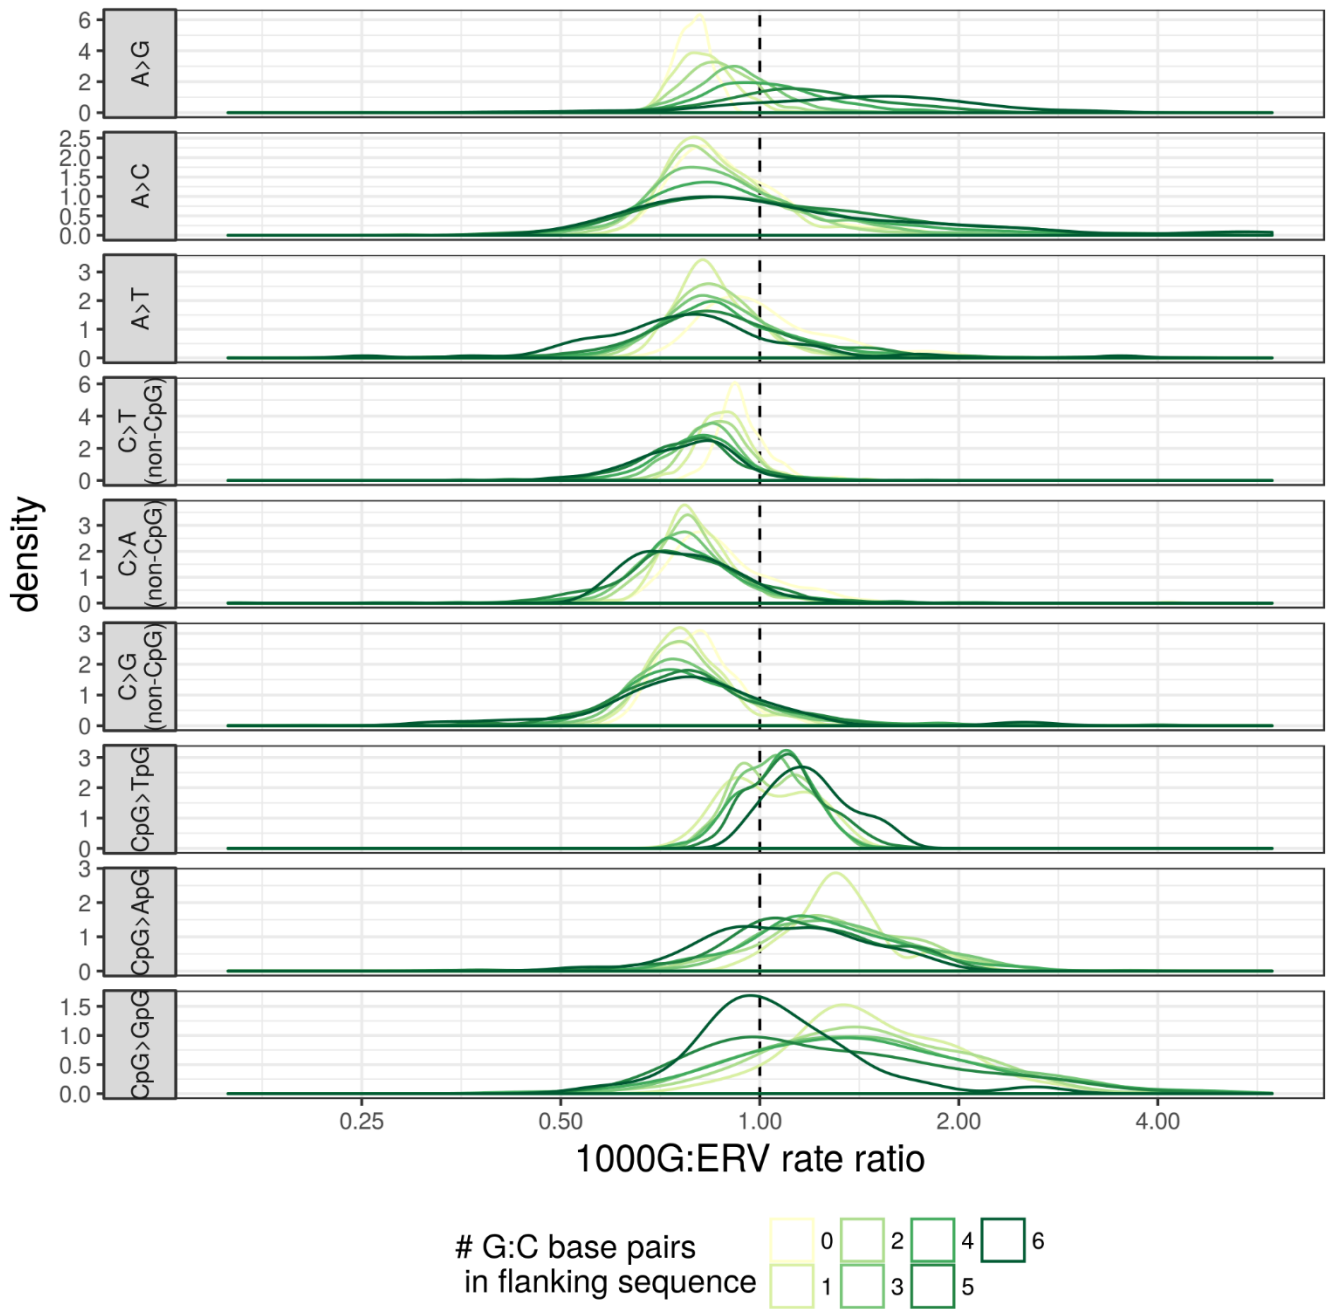

**Supplementary Figure 2 Density plots comparing the distribution of ratios between the 1000G and ERV rate estimates**

For each type, we grouped 7-mer subtypes by the number of G:C base pairs in the +/-3 flanking sequence, and plotted the distribution of ratios separately for each of these group. Mass to the right of the dashed line indicates estimated rates tend to be higher in the 1000G data, while mass to the left shows subtypes where estimated rates are higher in the BRIDGES ERV data.

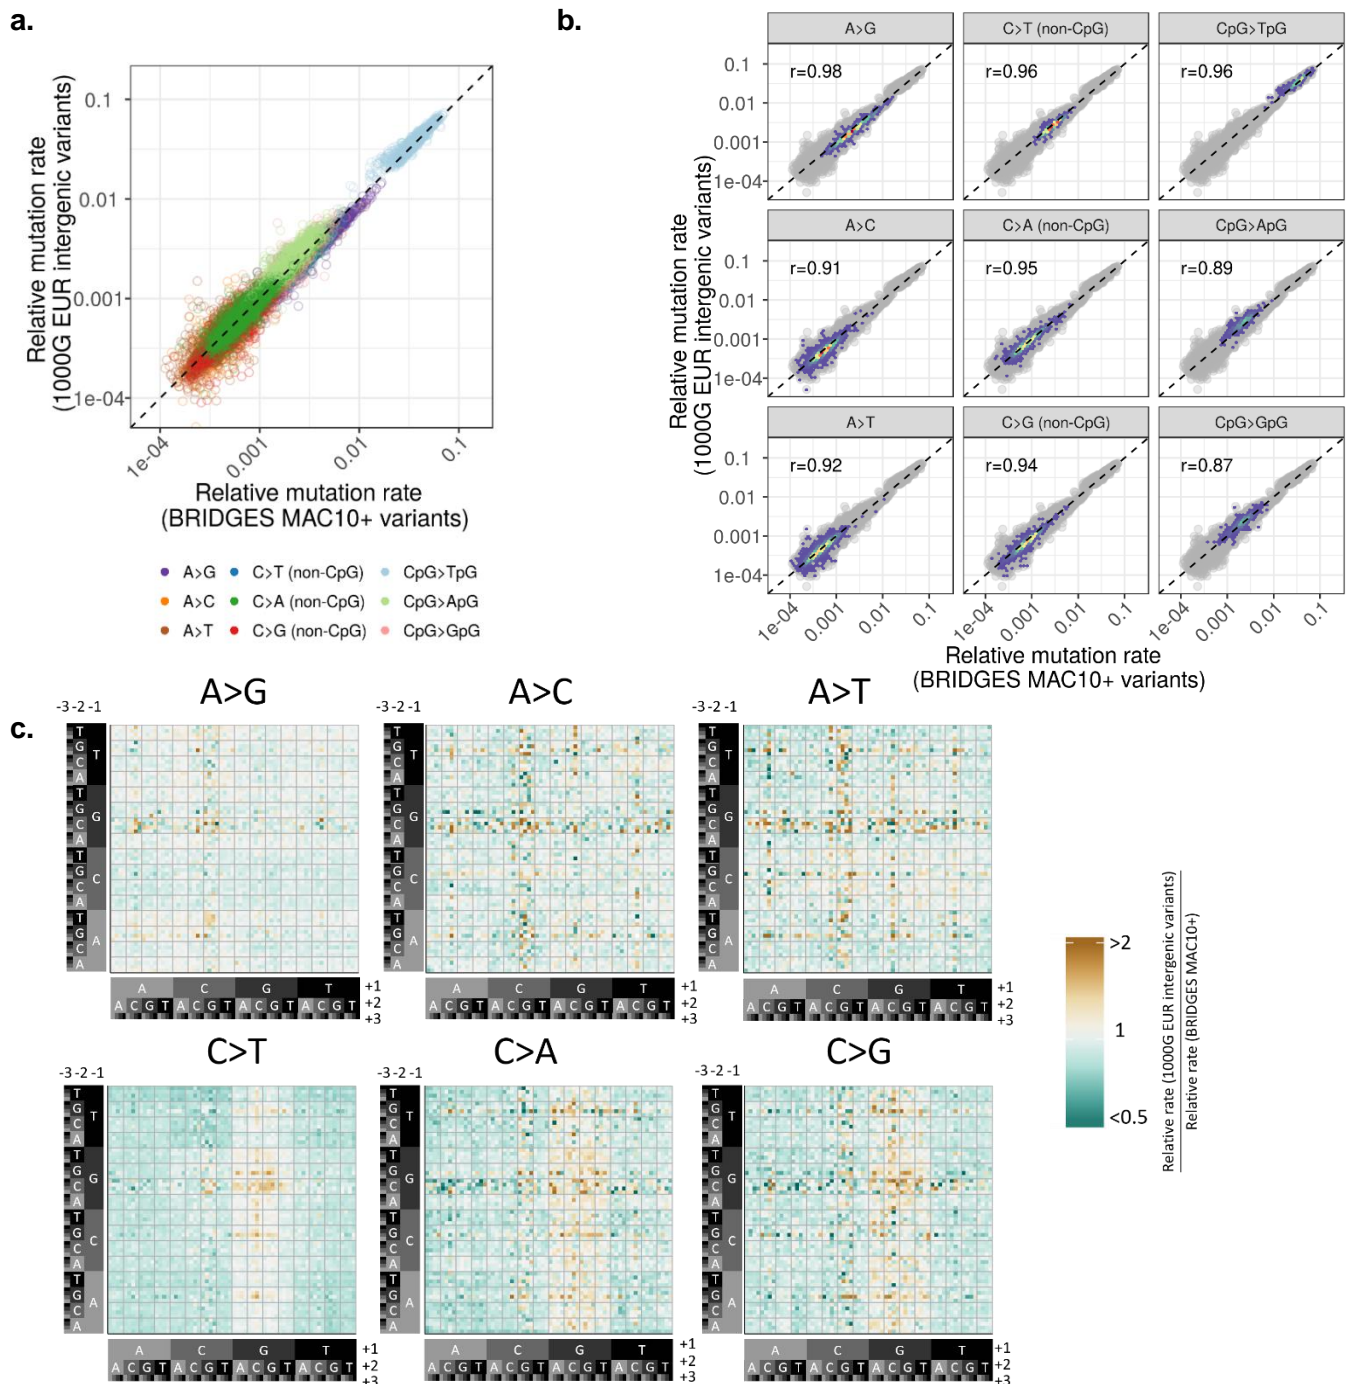

### Supplementary Figure 3

**Comparison of 7-mer relative mutation rates estimated from BRIDGES MAC10+ variants and 1000G Intergenic SNVs** (a) Scatterplot of 7-mer subtype rates estimated from the BRIDGES MAC10+ data (x-axis), and 1000G intergenic SNV data (y-axis) (b) Type-specific 2D-density plots, as situated in the scatterplot of a. The dashed line indicates an expected least-squares regression line if there is no bias present. (c) Heatmap shows ratio between relative mutation rates calculated on MAC10+ variants and 1000G variants for each 7-mer mutation subtype. Subtypes with higher 1000G-derived rates relative to MAC10+-derived rates are shaded gold, and subtypes with lower 1000G-derived rates relative to MAC10+-derived rates are shaded green. 1000G-derived rates shown here are scaled relative to the MAC10+-derived rates.



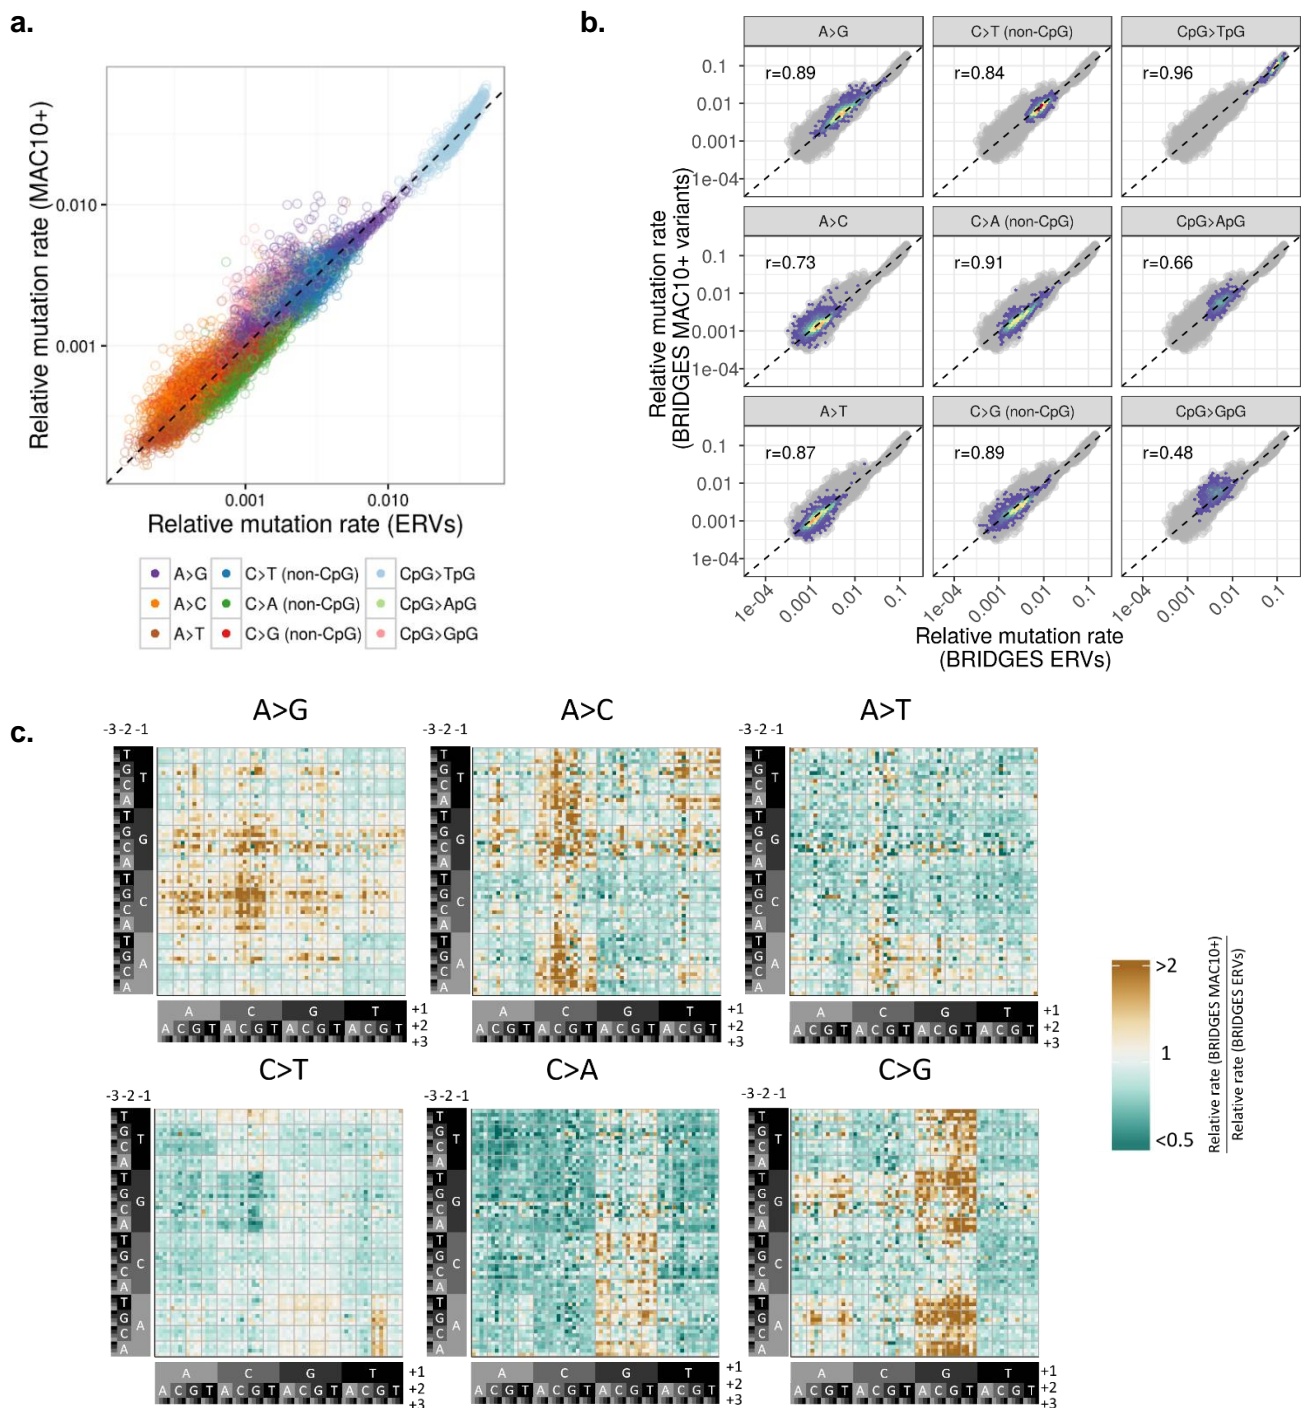

## Supplementary Figure 4

**Comparison of 7-mer relative mutation rates estimated from BRIDGES ERVs and BRIDGES MAC10+ variants** (a) Scatterplot of 7-mer subtype rates estimated from the BRIDGES ERV data, after randomly downsampling the ERVs to 12,088,037 (x-axis) and the BRIDGES MAC10+ data (y-axis). (b) Type-specific 2D-density plots, as situated in the scatterplot of a. The dashed line indicates an expected least-squares regression line if there is no bias present. (c) Heatmap shows ratio between relative mutation rates calculated on MAC10+ variants and ERVs for each 7-mer mutation subtype. Subtypes with higher MAC10+-derived rates relative to ERV-derived rates are shaded gold, and subtypes with lower MAC10+-derived rates relative to ERV-derived rates are shaded green.

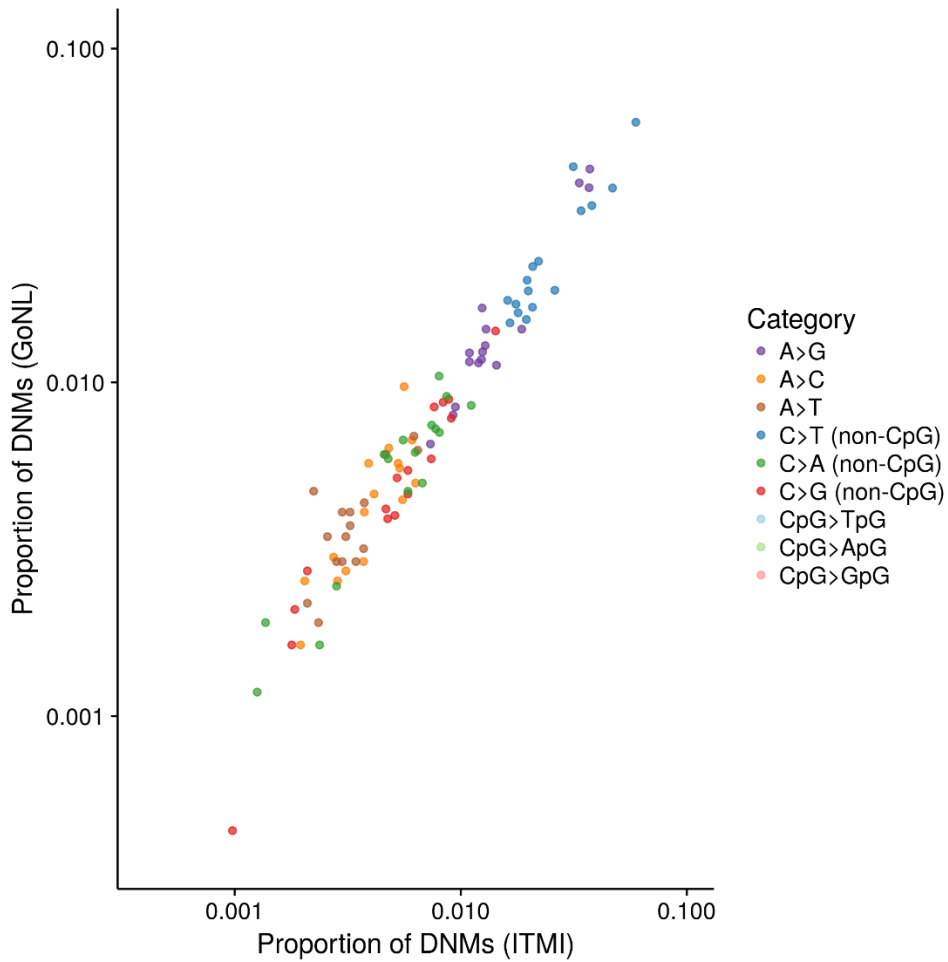

### Supplementary Figure 5

#### Similar mutation spectra of the GoNL and ITMI data

Scatterplot shows the 3-mer mutational spectra (i.e., the proportion of all mutations falling within each of the 96 3-mer subtypes), calculated among *de novo* mutations from the ITMI (x-axis) GoNL (y-axis) trio sequencing studies.



a.

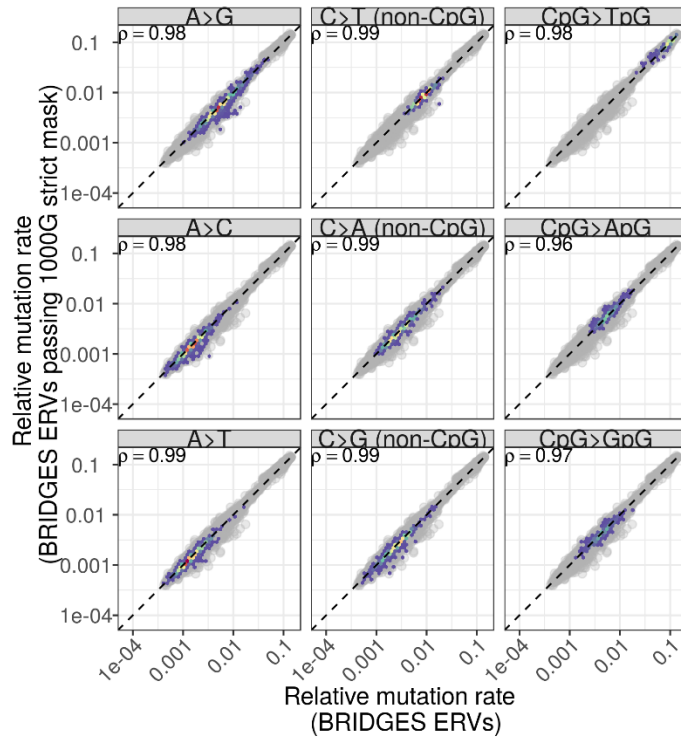

b.

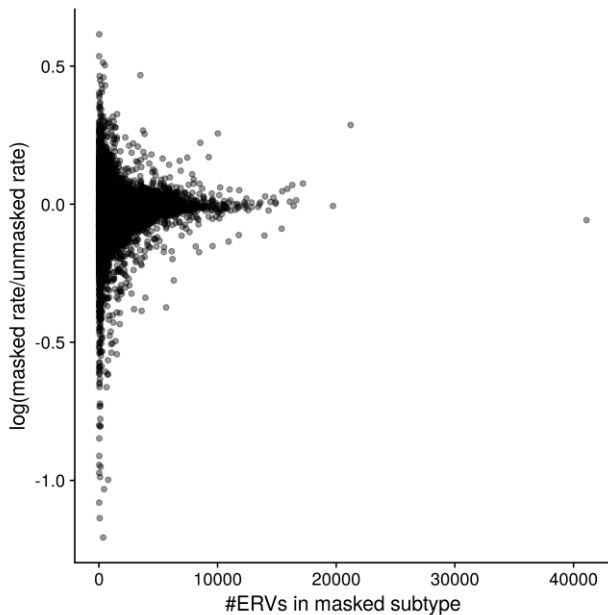

### Supplementary Figure 6

**Genome-wide estimates for ERV-based 7-mer subtypes are consistent with estimates from ERVs restricted to uniquely-mappable regions**

(a) Relationship between masked and unmasked 7-mer relative mutation rate estimates, separated by type. (b) Relationship between number of ERVs per subtype (x axis) and discordance between the masked and unmasked rates, measured as the log ratio between the estimates (y axis).

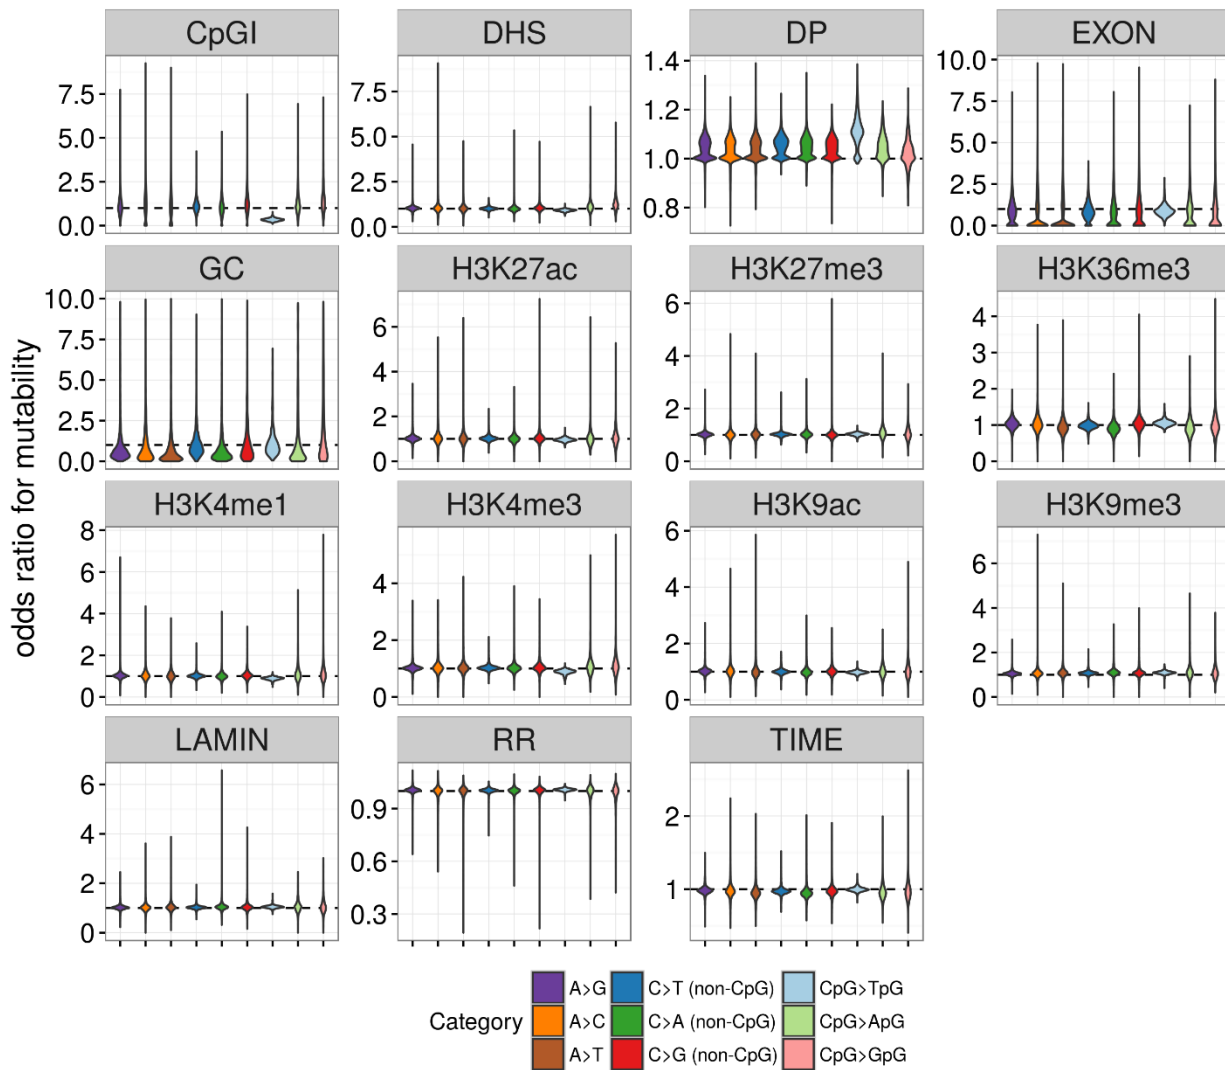

### Supplementary Figure 7

#### Distributions of effect sizes on mutability for 14 genomic features and depth of sequencing

For each feature, we plotted the empirical distributions of the subtype-specific odds ratios for each basic mutation type, as estimated by our logistic regression models. \*Replication timing is coded with negative values indicating later replicating regions, so an OR<1 means mutation rate increases in late-replicating regions.

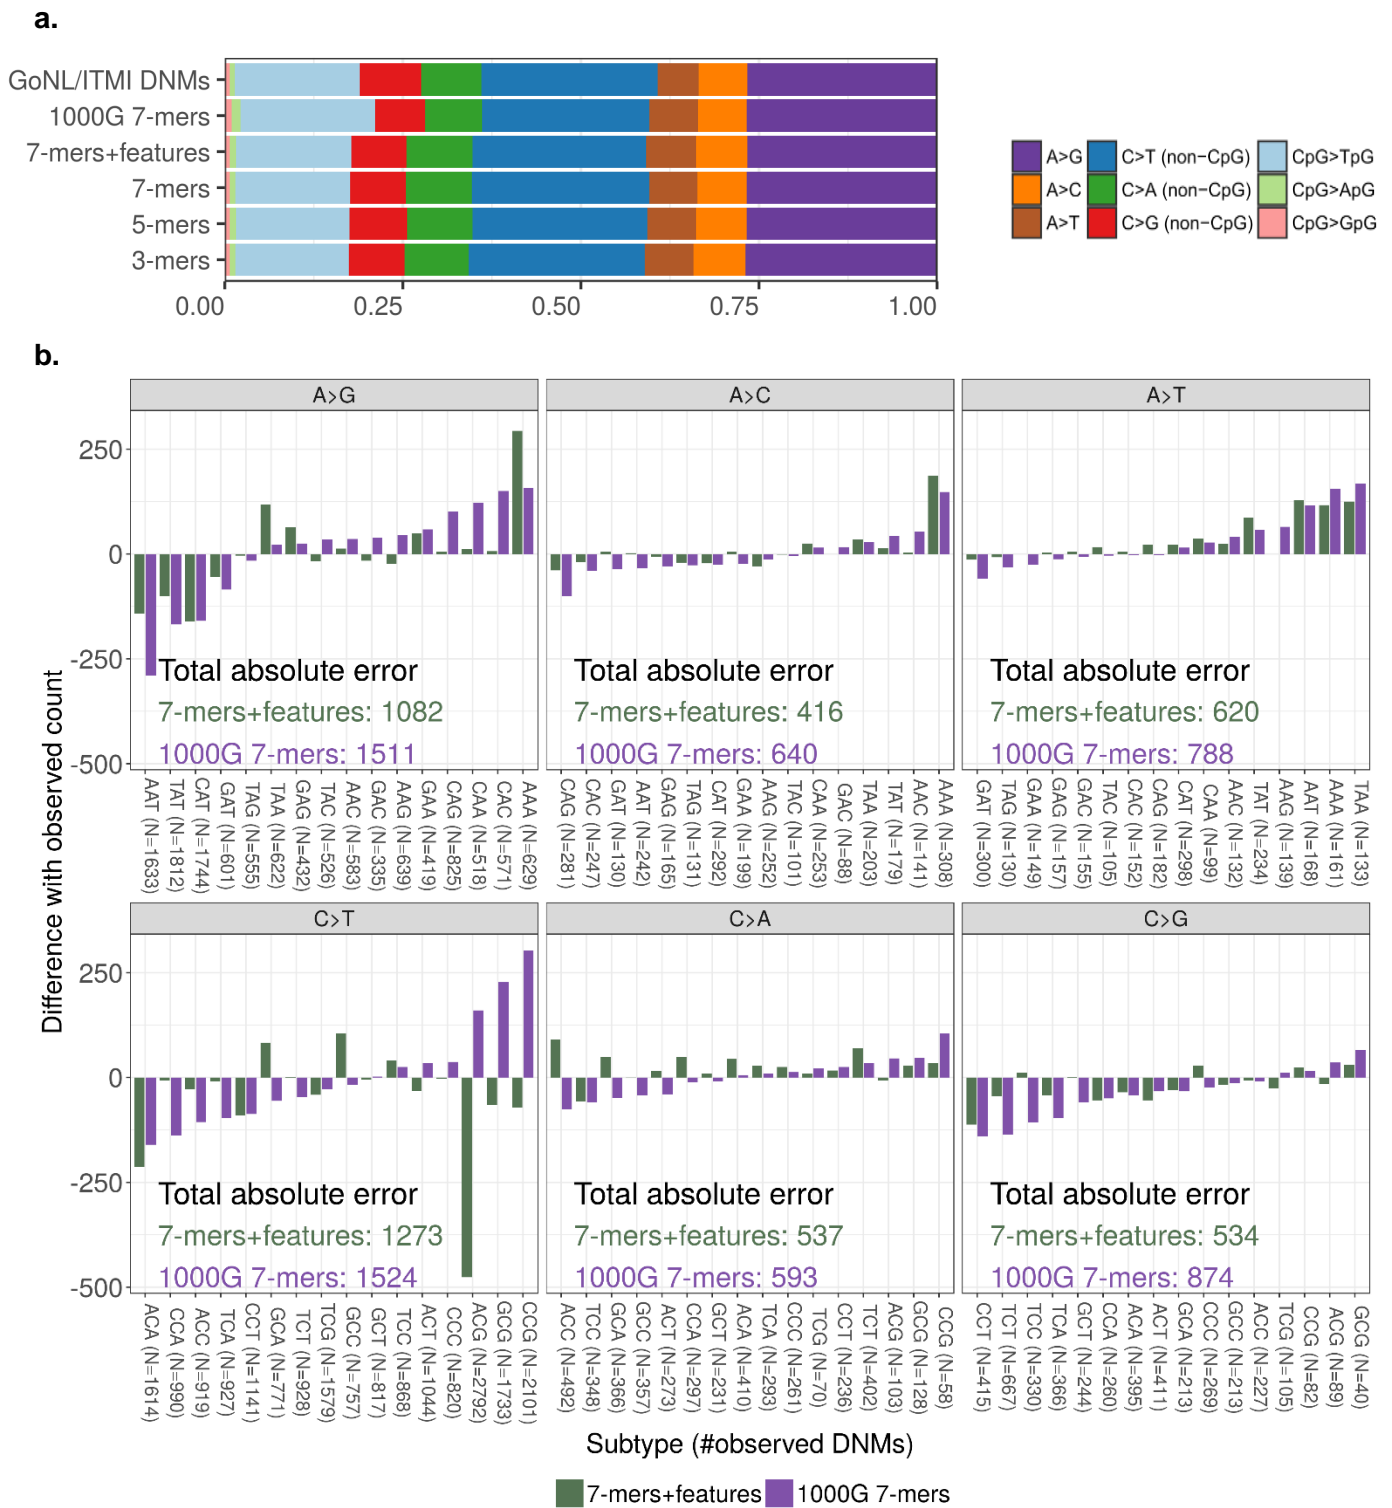

## Supplementary Figure 8

**Predicted mutation distributions under ERV-based models are more accurate than 1000G model**

**(a)** Distribution of the GoNL/ITMI *de novo* mutations across basic mutation types compared to the distributions predicted under the 1000G 7-mer model and each of the BRIDGES ERV-based models.

**(b)** Difference between model-predicted and observed number of mutations per 3-mer subtype for the 7-mer+features model (green bars) and 1000G 7-mer model (purple bars). The number of observed mutations for each subtype is indicated along the x-axis. In each panel, subtypes are sorted in increasing order of differences under the 1000G 7-mers model.

## Supplementary Tables

**Supplementary Table 1 Quality comparison between filtered partitions of BRIDGES singletons**

| Partition                              | # Singletons | Ts/Tv ratio | %dbSNP (b142) | % of Full Set |
|----------------------------------------|--------------|-------------|---------------|---------------|
| Full Set                               | 35,574,417   | 2.00        | 17.4          | 100           |
| Filter 2 (MQ>56)                       | 33,550,098   | 2.01        | 17.3          | 94            |
| Filter 3 (passed 1000G strict mask)    | 26,810,791   | 1.97        | 17.5          | 75            |
| All Filters (MQ>56, 1000G strict mask) | 16,535,856   | 2.00        | 17.6          | 46            |

**Supplementary Table 2 t-tests for differences in mean 1000G/ERV ratio of GC-poor vs. GC-rich 7-mer motifs**

| Type          | Mean 1000G/ERV ratio ( $\leq 3$ C/G bases) | Mean 1000G/ERV ratio ( $\geq 4$ C/G bases) | P-value   |
|---------------|--------------------------------------------|--------------------------------------------|-----------|
| A>C           | 0.97                                       | 1.12                                       | 8.00e-30  |
| A>G           | 1.00                                       | 1.28                                       | 2.37e-161 |
| A>T           | 0.89                                       | 0.89                                       | 0.81      |
| C>A (non-CpG) | 0.76                                       | 0.72                                       | 2.61e-09  |
| C>G (non-CpG) | 0.89                                       | 0.93                                       | 2.98e-04  |
| C>T (non-CpG) | 0.93                                       | 0.85                                       | 1.75e-39  |
| CpG>ApG       | 1.15                                       | 0.96                                       | 4.97e-22  |
| CpG>GpG       | 1.46                                       | 1.33                                       | 2.80e-04  |
| CpG>TpG       | 1.02                                       | 0.98                                       | 1.01e-09  |

For each mutation subtype, we calculated the ratio between 1000G-derived and ERV-derived relative mutation rates. Then, for each of the 9 basic types, we grouped 7-mer subtypes into low C/G subtypes ( $\leq 3$  C/G bases in the +/-3 flanking positions) and high C/G subtypes ( $\geq 4$  C/G bases in the +/-3 flanking positions) and performed t-tests for differences in the mean 1000G/ERV ratios of these two groups.

**Supplementary Table 3 Comparison of observed and simulated goodness-of-fit for *de novo* prediction models under different sized non-mutated backgrounds**

| Model                          | Observed |                | Simulated |                  | Background size |
|--------------------------------|----------|----------------|-----------|------------------|-----------------|
|                                | AIC      | R <sup>2</sup> | AIC       | R <sup>2</sup> * |                 |
| 1-mers                         | 292542   | .109           | 272925    | .185             | 500,000         |
| 3-mers                         | 284889   | .139           | 241863    | .299             |                 |
| 5-mers                         | 282995   | .146           | 239672    | .307             |                 |
| 7-mers                         | 282491   | .148           | 238967    | <b>.310</b>      |                 |
| 7-mers (BRIDGES MAC10+ SNVs)   | 283599   | .144           | 240434    | .304             |                 |
| 7-mers (1000G intergenic SNVs) | 284764   | .139           | 241724    | .300             |                 |
| 1-mers                         | 353896   | .088           | 344108    | .117             | 1,000,000       |
| 3-mers                         | 335319   | .118           | 317322    | .197             |                 |
| 5-mers                         | 332861   | .124           | 315400    | .202             |                 |
| 7-mers                         | 332321   | .126           | 314760    | <b>.204</b>      |                 |
| 7-mers (BRIDGES MAC10+ SNVs)   | 342886   | .103           | 316791    | .198             |                 |
| 7-mers (1000G intergenic SNVs) | 344003   | .100           | 317953    | .195             |                 |
| 1-mers                         | 416998   | .072           | 414016    | .080             | 2,000,000       |
| 3-mers                         | 404738   | .102           | 392367    | .132             |                 |
| 5-mers                         | 402853   | .107           | 390698    | .136             |                 |
| 7-mers                         | 402375   | .108           | 390051    | <b>.138</b>      |                 |
| 7-mers (BRIDGES MAC10+ SNVs)   | 404378   | .103           | 392509    | .132             |                 |
| 7-mers (1000G intergenic SNVs) | 405523   | .100           | 393741    | .129             |                 |
| 1-mers                         | 454267   | .066           | 452950    | .069             | 3,000,000       |
| 3-mers                         | 441042   | .095           | 434665    | .109             |                 |
| 5-mers                         | 439153   | .099           | 433243    | .112             |                 |
| 7-mers                         | 438700   | .100           | 432517    | <b>.114</b>      |                 |
| 7-mers (BRIDGES MAC10+ SNVs)   | 441059   | .095           | 435270    | .108             |                 |
| 7-mers (1000G intergenic SNVs) | 442181   | .092           | 436443    | .105             |                 |

\*The simulated R<sup>2</sup> of the best possible model for each background size, indicated in bold, represents the optimal performance we can expect.

**Supplementary Table 4 Comparison of model AIC considering only *de novo* mutations from the GoNL or ITMI study**

| Model                          | GoNL DNMs<br>(11,020 mutations) | ITMI DNMs<br>(35,793 mutations) |
|--------------------------------|---------------------------------|---------------------------------|
| 1-mers                         | 114945                          | 288707                          |
| 3-mers                         | 111952                          | 280025                          |
| 5-mers                         | 111507                          | 278542                          |
| 7-mers                         | 111381                          | 278201                          |
| 7-mers (BRIDGES MAC10+ SNVs)   | 111913                          | 279580                          |
| 7-mers (1000G intergenic SNVs) | 112185                          | 280401                          |

Models fitted to a background of 1 million non-mutated sites, as described previously. Note that the difference in AIC between the two datasets is due to the difference in number of DNMs and is not comparable between the GoNL and ITMI studies. Goodness of fit statistics for both datasets have the same rank order.

**Supplementary Table 5 Type-specific model fit statistics for mutation rate estimation strategies applied to the *de novo* testing data. Each type is shown in a sub-table, with the number of *de novo* mutations and non-mutated sites used in the partitioned testing data indicated in the subheading.**

**A>C (2920 *de novo* mutations; 198481 non-mutated sites)**

| Model                             | Nagelkerke's R <sup>2</sup> | AIC   |
|-----------------------------------|-----------------------------|-------|
| 3-mers                            | 0.002                       | 32831 |
| 5-mers                            | 0.007                       | 32701 |
| 7-mers                            | 0.009                       | 32641 |
| 7-mers+features                   | 0.009                       | 32636 |
| 7-mers (downsampled BRIDGES ERVs) | 0.008                       | 32670 |
| 7-mers (BRIDGES MAC10+ SNVs)      | 0.003                       | 32809 |
| 7-mers (1000G intergenic SNVs)    | 0.004                       | 32775 |

**A>G (11400 *de novo* mutations; 198793 non-mutated sites)**

| Model                             | Nagelkerke's R <sup>2</sup> | AIC   |
|-----------------------------------|-----------------------------|-------|
| 3-mers                            | 0.039                       | 91474 |
| 5-mers                            | 0.065                       | 89455 |
| 7-mers                            | 0.068                       | 89212 |
| 7-mers+features                   | 0.069                       | 89111 |
| 7-mers (downsampled BRIDGES ERVs) | 0.064                       | 89505 |
| 7-mers (BRIDGES MAC10+ SNVs)      | 0.061                       | 89732 |
| 7-mers (1000G intergenic SNVs)    | 0.061                       | 89746 |

**A>T (2455 *de novo* mutations; 198320 non-mutated sites)**

| Model                             | Nagelkerke's R <sup>2</sup> | AIC   |
|-----------------------------------|-----------------------------|-------|
| 3-mers                            | 0.015                       | 28130 |
| 5-mers                            | 0.016                       | 28114 |
| 7-mers                            | 0.016                       | 28106 |
| 7-mers+features                   | 0.016                       | 28105 |
| 7-mers (downsampled BRIDGES ERVs) | 0.007                       | 28350 |
| 7-mers (BRIDGES MAC10+ SNVs)      | 0.001                       | 28498 |
| 7-mers (1000G intergenic SNVs)    | 0.003                       | 28463 |

**non-CpG C>A (3620 *de novo* mutations; 128765 non-mutated sites)**

| Model                             | Nagelkerke's R <sup>2</sup> | AIC   |
|-----------------------------------|-----------------------------|-------|
| 3-mers                            | 0.012                       | 35362 |
| 5-mers                            | 0.022                       | 35039 |
| 7-mers                            | 0.03                        | 34794 |
| 7-mers+features                   | 0.032                       | 34743 |
| 7-mers (downsampled BRIDGES ERVs) | 0.029                       | 34823 |
| 7-mers (BRIDGES MAC10+ SNVs)      | 0.024                       | 35000 |
| 7-mers (1000G intergenic SNVs)    | 0.027                       | 34892 |

**non-CpG C>G (3561 *de novo* mutations; 128746 non-mutated sites)**

| Model                             | Nagelkerke's R <sup>2</sup> | AIC   |
|-----------------------------------|-----------------------------|-------|
| 3-mers                            | 0.006                       | 35889 |
| 5-mers                            | 0.018                       | 35490 |
| 7-mers                            | 0.024                       | 35321 |
| 7-mers+features                   | 0.024                       | 35321 |
| 7-mers (downsampled BRIDGES ERVs) | 0.023                       | 35350 |
| 7-mers (BRIDGES MAC10+ SNVs)      | 0.019                       | 35480 |
| 7-mers (1000G intergenic SNVs)    | 0.018                       | 35489 |

**non-CpG C>T (10321 *de novo* mutations; 128774 non-mutated sites)**

| Model                             | Nagelkerke's R <sup>2</sup> | AIC   |
|-----------------------------------|-----------------------------|-------|
| 3-mers                            | 0.005                       | 79879 |
| 5-mers                            | 0.012                       | 79502 |
| 7-mers                            | 0.014                       | 79379 |
| 7-mers+features                   | 0.014                       | 79353 |
| 7-mers (downsampled BRIDGES ERVs) | 0.013                       | 79395 |
| 7-mers (BRIDGES MAC10+ SNVs)      | 0.012                       | 79487 |
| 7-mers (1000G intergenic SNVs)    | 0.013                       | 79434 |

**CpG>ApG (304 *de novo* mutations; 6108 non-mutated sites)**

| Model                             | Nagelkerke's R <sup>2</sup> | AIC  |
|-----------------------------------|-----------------------------|------|
| 3-mers                            | 0.014                       | 2788 |
| 5-mers                            | 0.024                       | 2767 |
| 7-mers                            | 0.027                       | 2763 |
| 7-mers+features                   | 0.029                       | 2761 |
| 7-mers (downsampled BRIDGES ERVs) | 0.025                       | 2763 |
| 7-mers (BRIDGES MAC10+ SNVs)      | 0.022                       | 2771 |
| 7-mers (1000G intergenic SNVs)    | 0.025                       | 2762 |

**CpG>GpG (270 *de novo* mutations; 6292 non-mutated sites)**

| Model                             | Nagelkerke's R <sup>2</sup> | AIC  |
|-----------------------------------|-----------------------------|------|
| 3-mers                            | 0.013                       | 2560 |
| 5-mers                            | 0.015                       | 2557 |
| 7-mers                            | 0.022                       | 2545 |
| 7-mers+features                   | 0.026                       | 2538 |
| 7-mers (downsampled BRIDGES ERVs) | 0.015                       | 2556 |
| 7-mers (BRIDGES MAC10+ SNVs)      | 0.015                       | 2556 |
| 7-mers (1000G intergenic SNVs)    | 0.011                       | 2564 |

**CpG>TpG (6960 *de novo* mutations; 6289 non-mutated sites)**

| Model                             | Nagelkerke's R <sup>2</sup> | AIC   |
|-----------------------------------|-----------------------------|-------|
| 3-mers                            | 0.011                       | 20321 |
| 5-mers                            | 0.02                        | 20232 |
| 7-mers                            | 0.025                       | 20173 |
| 7-mers+features                   | 0.06                        | 19777 |
| 7-mers (downsampled BRIDGES ERVs) | 0.024                       | 20182 |
| 7-mers (BRIDGES MAC10+ SNVs)      | 0.027                       | 20151 |
| 7-mers (1000G intergenic SNVs)    | 0.027                       | 20148 |

**Supplementary Table 6 Genomic features used in mutation models**

| Feature                                                        | Source                                                                          | Cell Type                                      | Resolution                             |
|----------------------------------------------------------------|---------------------------------------------------------------------------------|------------------------------------------------|----------------------------------------|
| H3K4me1, H3K4me3, H3K9ac, H3K9me3, H3K27ac, H3K27me3, H3K36me3 | Roadmap Epigenomics Project <sup>11</sup>                                       | Peripheral Blood Mononuclear Primary Cells     | 1bp (inside vs. outside of broad peak) |
| Replication timing                                             | Koren et al., 2012 <sup>12</sup>                                                | Lymphoblastoid                                 | 1kb window                             |
| Recombination rate                                             | Kong et al., 2010 <sup>13</sup><br>(deCODE sex-averaged recombination rate map) | --                                             | 10kb window                            |
| Lamin B1 domains                                               | Guelen et al., 2008 <sup>14</sup>                                               | Tig3ET normal human embryonic lung fibroblasts | 1bp (inside vs. outside of LAD)        |
| DNase hypersensitivity sites                                   | ENCODE                                                                          | multiple                                       | 1bp (inside vs. outside of DHS region) |
| Exonic site                                                    | RefSeq gene database                                                            | --                                             | 1bp (inside vs. outside of exon)       |
| CpG island                                                     | Wu et al., 2010 <sup>15</sup>                                                   | --                                             | 1bp (inside vs. outside of CpG island) |
| % GC content                                                   | Calculated from reference genome                                                | --                                             | 10kb                                   |

A script to download the exact external data files used in this paper is available at <https://github.com/carjed/smaug-genetics>



**Supplementary Table 7 Chi-squared tests for enrichment or depletion of *de novo* mutations occurring in feature-associated subtypes**

| Feature                            | Expected direction of effect | <i>de novo</i> relative mutation rate |                              | p-value          |
|------------------------------------|------------------------------|---------------------------------------|------------------------------|------------------|
|                                    |                              | <sup>a</sup> Inside feature           | <sup>b</sup> Outside feature |                  |
| H3K9me3 <sup>†</sup>               | Increased                    | 1.98E-05                              | 1.73E-05                     | <b>4.87E-05</b>  |
| High Recombination rate (> 2)      | Increased                    | 3.66E-05                              | 3.43E-05                     | 0.18             |
| H3K27me3 <sup>†</sup>              | Decreased                    | 5.44E-06                              | 3.14E-06                     | 0.99             |
| H3K27ac                            | Decreased                    | 1.22E-04                              | 1.23E-04                     | 0.50             |
| Exons                              | Decreased                    | 1.20E-04                              | 8.66E-05                     | 0.99             |
| H3K4me1                            | Decreased                    | 1.10E-04                              | 1.40E-04                     | <b>1.84E-10</b>  |
| H3K4me3 <sup>†</sup>               | Decreased                    | 1.00E-04                              | 1.50E-04                     | <b>4.92E-23</b>  |
| H3K9ac <sup>†</sup>                | Decreased                    | 1.49E-05                              | 7.49E-06                     | 0.99             |
| Lamin-associated domains           | Increased                    | 6.91E-05                              | 7.46E-05                     | 0.75             |
| High GC content (> 0.55)           | Decreased                    | 1.23E-05                              | 9.74E-06                     | 0.82             |
|                                    | Increased                    | 1.14E-05                              | 4.65E-06                     | <b>6.61E-04</b>  |
| H3K36me3                           | Decreased                    | 4.73E-06                              | 6.14E-06                     | <b>2.59E-03</b>  |
|                                    | Increased                    | 1.99E-05                              | 1.51E-05                     | <b>5.50E-10</b>  |
| CpG Islands                        | Decreased                    | 3.68E-05                              | 1.60E-04                     | <b>5.00E-117</b> |
|                                    | Increased                    | 5.39E-06                              | 6.69E-06                     | 0.79             |
| Late replication timing (< -1.25)* | Increased                    | 6.18E-06                              | 5.48E-06                     | <b>0.026</b>     |
| Early replication timing (> 1.25)* | Increased                    | 1.55E-05                              | 8.06E-06                     | <b>2.25E-02</b>  |
| DHS                                | Decreased                    | 5.03E-05                              | 3.08E-05                     | 0.99             |
|                                    | Increased                    | 1.75E-05                              | 1.21E-05                     | <b>4.92E-04</b>  |

Significant differences that are consistent with the expected direction of effect are indicated by a one-sided p-value in bold. <sup>†</sup>Four features had associations in the opposite direction, but these predicted effects could not be tested due to a lack of *de novo* mutations observed within the associated subtypes. \*Some subtypes showed a significant *negative* association with replication timing, such that the mutation rate would be higher in *early*- rather than late-replicating regions, so we tested these subtypes separately.
